# Supplementary material
Source: publisher figshare collection journal article supplement (https://karger.figshare.com/ndownloader/files/38287890)
Supplement: Supplementary file 1 [file 38287890]

Supplementary Table 2. The clinical information in the TCGA data set

| Characteristic | Number of patients(N=72) |
| --- | --- |
| Age |  |
| ≤60 | 47 |
| >60 | 25 |
| Gender |  |
| Female | 9 |
| Male | 63 |
| Smoking |  |
| Yes | 45 |
| No | 25 |
| Unkown | 2 |
| Lymph node metastases |  |
| No | 43 |
| Yes | 29 |
| TNM stage |  |
| I | 5 |
| II | 45 |
| III | 19 |
| IV | 3 |
